# Supplementary material
Source: MDPI journal article supplement (https://www.mdpi.com/2306-5710/9/1/28)
Supplement: s1 [file s1]

**Table S1.** Concentrations (mg L<sup>-1</sup>) of volatile compounds in *Monastrell* young, aged and *Fondillón* wines.

| Code | Volatile compound            | Retention Time (min) | Chemical Family | Odor Threshold <sup>†</sup> (µg L <sup>-1</sup> ) | Odor Descriptor <sup>‡</sup>   | Young                 | Aged                                   | Fondillón |         |
|------|------------------------------|----------------------|-----------------|---------------------------------------------------|--------------------------------|-----------------------|----------------------------------------|-----------|---------|
|      |                              |                      |                 |                                                   |                                | (mg L <sup>-1</sup> ) |                                        |           |         |
|      |                              |                      |                 |                                                   |                                | ANOVA <sup>§</sup>    | Tukey Multiple Range Test <sup>¶</sup> |           |         |
| V1   | 1,1-Diethoxyethane           | 4.333                | Acetals         | -                                                 | Honey, floral, green           | ***                   | 0.00 b                                 | 0.00 b    | 0.13 a  |
| V2   | Isoamyl alcohol              | 4.541                | Alcohols        | 30000                                             | Cheese                         | NS                    | 6.26                                   | 8.19      | 7.1     |
| V3   | 2,3-Butanediol               | 5.689                | Alcohols        | 150000                                            | Buttery                        | NS                    | 0.18                                   | 0.16      | 0.17    |
| V4   | Ethyl butanoate              | 6.240                | Esters          | 20                                                | Fruity                         | NS                    | 0.02                                   | 0.02      | 0.04    |
| V5   | Ethyl Lactate                | 6.591                | Esters          | -                                                 | Butter, fruity                 | **                    | 0.07 b                                 | 0.15 b    | 0.27 a  |
| V6   | Furfural                     | 7.222                | Aldehydes       | 14100                                             | Almond, woody, sweet           | ***                   | 0.00 b                                 | 0.09 b    | 0.60 a  |
| V7   | Ethyl 2-methylbutanoate      | 7.978                | Esters          | 0.1                                               | Apple, green, fruity           | *                     | 0.02 b                                 | 0.05 a    | 0.03 ab |
| V8   | Ethyl 3-methylbutanoate      | 8.158                | Esters          | 3                                                 | Fruity, sweet apple, cherry    | **                    | 0.05 b                                 | 0.13 a    | 0.13 a  |
| V9   | Ethyl Isovalerate            | 8.426                | Esters          | 3                                                 | Apple                          | NS                    | 0.00                                   | 0.01      | 0.01    |
| V10  | 1-Hexanol                    | 8.788                | Alcohols        | 8000                                              | Herbaceous, woody, sweet       | NS                    | 0.29                                   | 0.24      | 0.22    |
| V11  | Isoamyl acetate              | 9.111                | Esters          | 30                                                | Banana, pear                   | NS                    | 0.35                                   | 0.56      | 0.45    |
| V12  | Butyrolactone                | 10.339               | Lactones        | -                                                 | Caramel                        | NS                    | 0.02                                   | 0.03      | 0.03    |
| V13  | 1,1-Diethoxy-2-methylpropane | 10.898               | Acetals         | -                                                 | -                              | **                    | 0.00 b                                 | 0.00 b    | 0.02 a  |
| V14  | Benzaldehyde                 | 12.773               | Aldehydes       | 2000                                              | Almond, anise, vanilla         | ***                   | 0.00 b                                 | 0.01 b    | 0.28 a  |
| V15  | 1-(1-Ethoxyethoxy)-pentane   | 13.388               | Acetals         | -                                                 | -                              | **                    | 0.00 b                                 | 0.00 b    | 0.03 a  |
| V16  | Hexanoic acid                | 14.056               | Acids           | 420                                               | Cheese, fatty, sour            | NS                    | 0.01                                   | 0.02      | 0.02    |
| V17  | Ethyl hexanoate              | 14.744               | Esters          | 14                                                | Fruity, floral, tropical fruit | NS                    | 0.94                                   | 1.32      | 1.32    |
| V18  | Hexyl acetate                | 15.414               | Esters          | 400                                               | Fruity, sweet floral           | NS                    | 0.01                                   | 0.02      | 0.02    |
| V19  | <i>p</i> -Cymene             | 15.941               | Terpenes        | -                                                 | Citrus                         | NS                    | 0.02                                   | 0.01      | 0.01    |
| V20  | Limonene                     | 16.206               | Terpenes        | 200                                               | Herbaceous, citrus, sweet      | NS                    | 0.17                                   | 0.15      | 0.4     |
| V21  | Benzyl alcohol               | 16.352               | Alcohols        | 200000                                            | Berry, cherry, citrus          | NS                    | 0.04                                   | 0.04      | 0.05    |
| V22  | Phenyl acetaldehyde          | 16.817               | Aldehydes       | -                                                 | -                              | *                     | 0.01 b                                 | 0.01 ab   | 0.02 a  |
| V23  | Ethyl 2-hexenoate            | 16.966               | Esters          | -                                                 | -                              | NS                    | 0.01                                   | 0.02      | 0.01    |
| V24  | Ethyl 2-furoate              | 17.239               | Esters          | -                                                 | Floral, plum                   | ***                   | 0.00 b                                 | 0.01 b    | 0.02 a  |

|     |                                               |        |           |            |                              |     |         |         |        |
|-----|-----------------------------------------------|--------|-----------|------------|------------------------------|-----|---------|---------|--------|
| V25 | $\gamma$ -Terpinene                           | 17.643 | Terpenes  |            | Herbaceous, citrus           | NS  | 0.02    | 0.00    | 0.00   |
| V26 | 1-(5-Methyl-2-furyl)-2-propanone <sup>§</sup> | 17.755 | Furans    | -          | -                            | *** | 0.00 b  | 0.00 b  | 0.03 a |
| V27 | Acetophenone                                  | 17.873 | Ketones   | 0.24 - 590 | Almond, sweet, floral        | *** | 0.00 b  | 0.01 b  | 0.01 a |
| V28 | Isoamyl butyrate                              | 18.126 | Esters    | -          | Apricot, banana, pineapple   | **  | 0.00 b  | 0.00 b  | 0.04 a |
| V29 | 1-Octanol                                     | 18.343 | Alcohols  | 120        | Citrus, fatty, woody         | NS  | 0.04    | 0.07    | 0.04   |
| V30 | Guaiacol                                      | 18.897 | Phenols   | 9.5        | Medicinal, smoky             | **  | 0.00 b  | 0.00 b  | 0.01 a |
| V31 | Ethyl sorbate                                 | 19.651 | Esters    | -          | Fruity                       | *** | 0.00 b  | 0.00 b  | 0.13 a |
| V32 | Linalool                                      | 19.753 | Terpenes  | 25.2       | Lemon, orange, sweet         | **  | 0.01 a  | 0.01 b  | 0.01 b |
| V33 | Nonanal                                       | 20.005 | Aldehydes | 1          | Apple, coconut, grape        | *** | 0.00 b  | 0.00 b  | 0.11 a |
| V34 | Phenylethyl Alcohol                           | 20.349 | Alcohols  | 14000      | Honey, rose                  | NS  | 3.28    | 3.17    | 2.23   |
| V35 | Methyl octanoate                              | 20.949 | Esters    | 200        | Fruity, green, citrus        | **  | 0.02 b  | 0.04 a  | 0.01 b |
| V36 | 3-Ethylphenol                                 | 23.052 | Phenols   | -          | -                            | *** | 0.01 b  | 0.59 a  | 0.06 b |
| V37 | Ethyl benzoate                                | 23.122 | Esters    | 575        | Anise, banana, grape, floral | *** | 0.02 b  | 0.02 b  | 0.05 a |
| V38 | 1-Nonanol                                     | 23.339 | Alcohols  | 58         | Citrus, rose                 | *   | 0.12 a  | 0.12 a  | 0.05 b |
| V39 | Diethyl butanedioate                          | 23.768 | Esters    | -          | Fruity                       | **  | 1.86 b  | 1.90 b  | 2.80 a |
| V40 | Octanoic acid                                 | 23.899 | Acids     | 500        | Rancid, cheese, oily         | *   | 0.16 ab | 0.24 a  | 0.13 b |
| V41 | Methyl salicylate                             | 24.179 | Esters    | -          | Spicy, minty, sweet          | NS  | 0.04    | 0.04    | 0.04   |
| V42 | $\alpha$ -Terpineol                           | 24.426 | Terpenes  | 250        | Lilac                        | NS  | 0.01    | 0.01    | 0.02   |
| V43 | Ethyl octanoate                               | 24.589 | Esters    | 5          | Apricot, floral, pear        | NS  | 3.12    | 3.65    | 2.31   |
| V44 | Diethyl methylsuccinate                       | 24.875 | Esters    | -          | -                            | *** | 0.00 b  | 0.00 b  | 0.01 a |
| V45 | Decanal                                       | 24.968 | Aldehydes | 1000       | Floral, citrus, sweet        | NS  | 0.02    | 0.02    | 0.04   |
| V46 | Citronellol                                   | 26.000 | Terpenes  | -          | Geranium, rose               | *   | 0.02 a  | 0.01 ab | 0.00 b |
| V47 | Neral                                         | 26.393 | Terpenes  | -          | Sweet, citral, lemon, peel   | NS  | 0.01    | 0.01    | 0.03   |
| V48 | Ethyl phenyl acetate                          | 26.573 | Esters    | -          | Anise, apple, honey          | NS  | 0.07    | 0.13    | 0.12   |
| V49 | Linalyl acetate                               | 27.082 | Esters    | -          | Floral, fruity, sweet        | NS  | 0.12    | 0.13    | 0.19   |
| V50 | Phenethyl acetate                             | 27.128 | Esters    | 250        | Caramel, honey, fruity       | NS  | 0.14    | 0.14    | 0.12   |
| V51 | Ethyl salicylate                              | 27.796 | Esters    | -          | Floral, fruity, minty        | *   | 0.01 b  | 0.01 ab | 0.02 a |
| V52 | Geranial                                      | 27.803 | Terpenes  | -          | Lemon, orange, sweet         | NS  | 0.00    | 0.01    | 0.03   |
| V53 | 4-Ethylguaiacol                               | 28.022 | Phenols   | 33         | Smoky, meaty                 | **  | 0.00 b  | 0.00 b  | 0.02 a |
| V54 | 1-Decanol                                     | 28.104 | Alcohols  | 400        | Fatty, fruity, rose          | NS  | 0.06    | 0.07    | 0.06   |

|     |                                               |        |               |         |                             |     |         |        |        |
|-----|-----------------------------------------------|--------|---------------|---------|-----------------------------|-----|---------|--------|--------|
| V55 | Vitispirane                                   | 28.372 | Norisoprenoid | -       | Woody, spicy                | *** | 0.12 c  | 0.22 b | 0.37 a |
| V56 | Geraniol                                      | 28.596 | Terpenes      | 20 - 30 | Apple, berry, sweet, floral | *** | 0.04 a  | 0.03 a | 0.00 b |
| V57 | <i>trans</i> -Whiskey lactone                 | 28.701 | Lactones      | 67      | Coconut, green              | *   | 0.02 b  | 0.05 a | 0.06 a |
| V58 | Ethyl nonanoate                               | 29.184 | Esters        | -       | Oily, fruity. Nutty         | *** | 0.35 a  | 0.15 b | 0.05 b |
| V59 | Undecanal                                     | 29.719 | Aldehydes     | -       | Orange, fatty, rose         | NS  | 0.00    | 0.00   | 0.01   |
| V60 | <i>cis</i> -Whiskey lactone                   | 30.139 | Lactones      | 67      | Coconut, green              | **  | 0.11 b  | 0.09 b | 0.17 a |
| V61 | Methyl decanoate                              | 30.448 | Esters        | -       | Oily, wine-like, fruity     | **  | 0.05 a  | 0.03 a | 0.01 b |
| V62 | Ethyl 3-phenyl propionate                     | 31.403 | Esters        | -       | -                           | **  | 0.01 b  | 0.01 b | 0.02 a |
| V63 | Isobutyl caprylate                            | 31.511 | Esters        | -       | -                           | *** | 0.01 b  | 0.02 a | 0.00 b |
| V64 | Eugenol                                       | 31.603 | Phenols       | 5 - 6   | Cinnamon, clove, spicy      | *   | 0.00 b  | 0.01 a | 0.01 a |
| V65 | TDN                                           | 31.677 | Norisoprenoid | 2 - 50  | Kerosene                    | *** | 0.00 b  | 0.04 b | 0.35 a |
| V66 | 2(3H)-Furanone, dihydro-5-pentyl <sup>§</sup> | 31.888 | Lactones      | -       | -                           | *** | 0.03 a  | 0.02 b | 0.01 c |
| V67 | Geranyl acetate                               | 31.978 | Esters        | -       | Fruity, floral, rose, sweet | NS  | 0.00    | 0.00   | 0.023  |
| V68 | Decanoic acid                                 | 32.423 | Acids         | 1000    | Fatty, citrus               | *** | 0.16 a  | 0.04 b | 0.05 b |
| V69 | Damascenone                                   | 32.833 | Ketones       | 0.05    | Apple, woody, nutty         | NS  | 0.06    | 0.03   | 0.03   |
| V70 | Ethyl 9-decenoate                             | 33.249 | Esters        | -       | Fruity                      | NS  | 0.25    | 0.17   | 0.17   |
| V71 | Ethyl decanoate                               | 33.673 | Esters        | 200     | Grape, oily, pear           | **  | 5.17 a  | 2.96 b | 2.00 b |
| V72 | Tetradecane                                   | 33.951 | Alkanes       | -       | -                           | **  | 0.03 a  | 0.01 b | 0.01 b |
| V73 | Dodecanal                                     | 34.242 | Aldehydes     | -       | Herbaceous, floral, sweet   | NS  | 0.02    | 0.02   | 0.04   |
| V74 | Isoamyl octanoate                             | 35.824 | Esters        | 125     | Coconut, fruity, sweet      | *   | 0.12 ab | 0.17 a | 0.08 b |
| V75 | Isoamyl caprylate                             | 35.934 | Terpenes      | -       | Woody, spicy                | NS  | 0.03    | 0.07   | 0.06   |
| V76 | <i>trans</i> -Caryophyllene                   | 36.104 | Terpenes      | -       | Herbal                      | *   | 0.02 a  | 0.02 a | 0.00 b |
| V77 | $\alpha$ -Curcumene                           | 37.231 | Esters        | -       | Coconut                     | NS  | 0.02    | 0.02   | 0.02   |
| V78 | Ethyl undecanoate                             | 37.843 | Terpenes      | -       | -                           | **  | 0.03 a  | 0.01 b | 0.01 b |
| V79 | $\alpha$ -Muurolene <sup>§</sup>              | 37.972 | Phenols       | -       | -                           | NS  | 0.22    | 0.03   | 0.01   |
| V80 | 2,4-Di-tert-butylphenol <sup>§</sup>          | 38.269 | Terpenes      | -       | Balsamic, woody             | NS  | 0.50    | 0.63   | 0.48   |
| V81 | $\beta$ -Bisabolene                           | 38.375 | Terpenes      | -       | Woody                       | NS  | 0.02    | 0.02   | 0.05   |
| V82 | $\beta$ -Cadinene <sup>§</sup>                | 38.792 | Terpenes      | -       | -                           | NS  | 0.01    | 0.01   | 0.01   |
| V83 | $\alpha$ -Calacorene <sup>§</sup>             | 39.652 | Norisoprenoid | -       | Earthy                      | NS  | 0.05    | 0.02   | 0.01   |
| V84 | 2,3,5-Trimethylnaphthalene                    | 40.461 | Norisoprenoid | -       | Earthy                      | NS  | 0.30    | 0.05   | 0.02   |

|     |                       |        |           |      |                          |     |        |        |        |
|-----|-----------------------|--------|-----------|------|--------------------------|-----|--------|--------|--------|
| V85 | Ethyl dodecanoate     | 41.845 | Esters    | 1500 | Coconut, creamy, soapy   | NS  | 0.59 a | 0.30 b | 0.37 b |
| V86 | Hexadecane            | 42.171 | Alkanes   | -    | -                        | NS  | 0.01   | 0.08   | 0.01   |
| V87 | Tetradecanal          | 42.572 | Aldehydes | -    | Fatty, waxy, creamy      | NS  | 0.02   | 0.01   | 0.02   |
| V88 | Isoamyl decanoate     | 43.799 | Esters    | -    | Fruity banana green      | NS  | 0.04   | 0.03   | 0.02   |
| V89 | 1-Tetradecanol        | 45.026 | Alcohols  | -    | -                        | NS  | 0.00   | 0.01   | 0.01 a |
| V90 | Ethyl tetradecanoate  | 49.266 | Esters    | -    | Waxy, soapy              | *** | 0.33 a | 0.06 b | 0.04 b |
| V91 | Isopropyl myristate   | 50.370 | Esters    | -    | Cheese, cherry, cinnamon | NS  | 0.02   | 0.01   | 0.01   |
| V92 | Ethyl 9-hexadecenoate | 55.284 | Esters    | -    | Fruity                   | **  | 0.05 a | 0.01 b | 0.01 b |
| V93 | Ethyl hexadecanoate   | 56.033 | Esters    | -    | Fruity                   | NS  | 0.19   | 0.28   | 0.15   |

<sup>†</sup> References: Ferreira, V.; López, R.; Cacho, J.F. Quantitative determination of the odorants of young red wines from different grape varieties. *J. Sci. Food Agric.* 2000, 80, 1659–1667. Gómez-Míguez, M.J.; Cacho, J.F.; Ferreira, V.; Vicario, I.M.; Heredia, F.J. Volatile components of Zalema white wines. *Food Chem.* 2007, 100, 1464–1473. Jiang, B.; Xi, Z.; Luo, M.; Zhang, Z. Comparison on aroma compounds in Cabernet Sauvignon and Merlot wines from four wine grape-growing regions in China. *Food Res. Int.* 2013, 51, 482–489. <sup>‡</sup>Reference: Sigma-Aldrich. *Flavors & Fragrances*; Sigma-Aldrich: Saint Louis, MO, USA, 2012. <sup>¥</sup> NS = not significant at  $p > 0.05$ ; \*, \*\*, \*\*\*, significant at  $p < 0.05$ , 0.01, and 0.001, respectively. <sup>£</sup> Values (mean of 3 replications) followed by the same letter, within the same row, were not significantly different ( $p > 0.05$ ), according to Tukey's least significant difference test. <sup>§</sup> Tentatively identified (no standard was available).

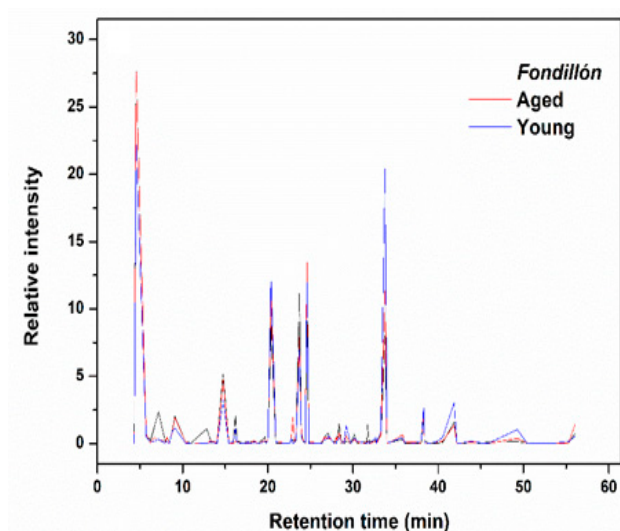

(a)

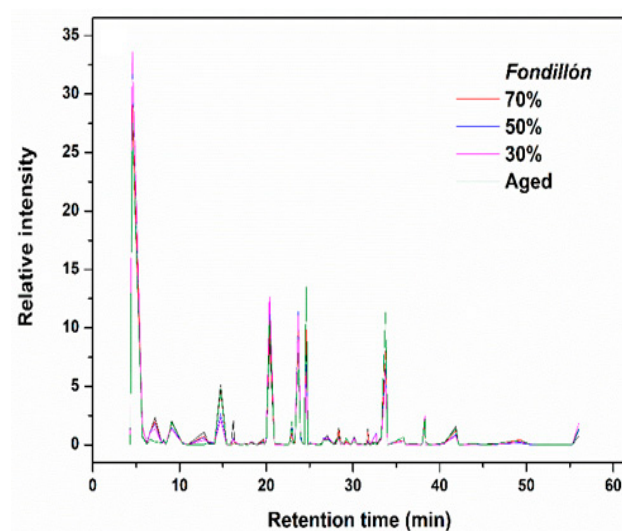

(b)

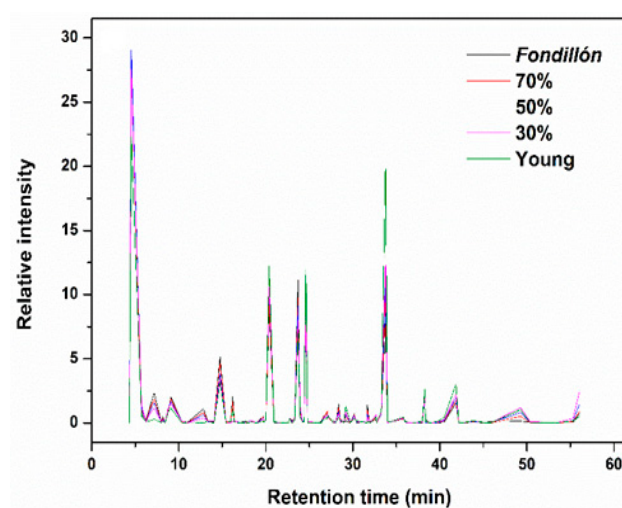

(c)

**Figure S1.** Plot of GC-MS chromatogram of (a) pure *Monastrell Fondillón*, aged and young wines, and adulterated *Fondillón* by the addition of (b) aged *Monastrell* wine, and (c) young *Monastrell* wine.
